# Supplementary material
Source: PubMed Central journal article supplement (PMC3154616)
Supplement: NIHMS210332-supplement-14.pdf [file NIHMS210332-supplement-14.pdf]

| Gene name                                                                | Symbol   | Cluster                  | Affy ID      | Cranial arches | Limbs | GT (10.5dpc) |
|--------------------------------------------------------------------------|----------|--------------------------|--------------|----------------|-------|--------------|
| Procollagen, type XVII, alpha 1                                          | Col17a1  | GT epithelium - enriched | 1418799_a_at | ND             | Y     | ND           |
| Gap junction membrane channel protein beta 2                             | Gjb2     | GT epithelium - enriched | 1423271_at   | Y              | Y     | U            |
| Keratin complex 2, basic, gene 6a                                        | Krt2-6a  | GT epithelium - enriched | 1422784_at   | ND             | N     | ND           |
| Keratin complex 2, basic, gene 5                                         | Krt2-5   | GT epithelium - enriched | 1424096_at   | Y              | Y     | U            |
| Distal-less homeobox 5                                                   | Dlx5     | GT epithelium - enriched | 1449863_a_at | Y              | Y     | Y            |
| Desmocollin 3                                                            | Dsc3     | GT epithelium - enriched | 1434534_at   | N              | N     | N            |
| Wingless-related MMTV integration site 7A                                | Wnt7a    | GT epithelium - enriched | 1423367_at   | Y              | Y     | N            |
| Chemokine (C-X-C motif) ligand 14                                        | Cxcl14   | GT epithelium - enriched | 1418457_at   | Y              | Y     | N            |
| Short stature homeobox 2                                                 | Shox2    | GT mesenchyme - enriched | 1438042_at   | Y              | Y     | U            |
| Lymphoid enhancer binding factor 1                                       | Lef1     | GT mesenchyme - enriched | 1454734_at   | Y              | Y     | Y            |
| Synaptotagmin 13                                                         | Syr13    | GT mesenchyme - enriched | 1434470_at   | ND             | N     | ND           |
| PR domain containing 1, with ZNF domain                                  | Prdm1    | GT mesenchyme - enriched | 1420425_at   | Y              | Y     | U            |
| Dickkopf homolog 1 (Xenopus laevis)                                      | Dkk1     | GT mesenchyme - enriched | 1420360_at   | Y              | Y     | Y            |
| transcription factor AP-2 beta                                           | Tcfap2b  | GT mesenchyme - enriched | 1435670_at   | Y              | Y     | U            |
| Heparan sulfate (glucosamine) 3-O-sulfotransferase 3B1                   | Hs3st3b1 | GT mesenchyme - enriched | 1433977_at   | Y              | Y     | N            |
| Wingless-related MMTV integration site 5A                                | Wnt5a    | GT mesenchyme - enriched | 1436791_at   | Y              | Y     | Y            |
| Potassium voltage-gated channel, shaker-related subfamily, beta member 1 | Kcnab1   | GT mesenchyme - enriched | 1448468_a_at | N              | N     | N            |
| Adenomatous polyposis coli down-regulated 1                              | Apcdd1   | GT mesenchyme - enriched | 1449070_x_at | Y              | Y     | Y            |
| Frizzled-related protein                                                 | Frzb     | GT mesenchyme - enriched | 1416658_at   | Y              | Y     | Y            |
| Major urinary protein 1                                                  | Mup1     | E14 GT restricted        | 1420465_s_at | Y              | Y     | U            |
| Dlx6 opposite strand transcript 1                                        | Dlx6os1  | E14 GT restricted        | 1438799_at   | Y              | N     | U            |
| Transient receptor potential cation channel, subfamily M, member 1       | Trpm1    | E14 GT restricted        | 1437445_at   | ND             | N     | ND           |
| Homeo box, msh-like 1                                                    | Msx1     | E14 GT restricted        | 1448601_s_at | Y              | Y     | Y            |
| Sclerostin domain containing 1                                           | Sostdc1  | E14 GT restricted        | 1449340_at   | Y              | N     | Y            |
| Wnt inhibitory factor 1                                                  | Wif1     | E13 urethra and GT       | 1425425_a_at | N              | Y     | U            |
| Distal-less homeobox 1                                                   | Dlx1     | E13 urethra and GT       | 1449470_at   | Y              | Y     | U            |
| Gap junction membrane channel protein alpha 1                            | Gja1     | E13 urethra and GT       | 1415801_at   | Y              | Y     | Y            |
| Odd-skipped related 2 (Drosophila)                                       | Osi2     | E13 urethra and GT       | 1426155_a_at | Y              | Y     | U            |
| Homeo box, msh-like 2                                                    | Msx2     | E13 bladder and GT       | 1449559_at   | Y              | Y     | U            |
| Transcription factor AP-2, gamma                                         | Tcfap2c  | E13 bladder and GT       | 1448977_at   | Y              | Y     | N            |
| Carboxypeptidase M                                                       | Cpm      | E13 bladder and GT       | 1429413_at   | ND             | N     | ND           |

U = Uncertain; ND = Not done
